# Supplementary material for: Glacier change and glacial lake outburst flood risk in the Bolivian Andes
Source: Copernicus journal article supplement (doi:10.5194/tc-10-2399-2016), 2016-10-20
Supplement: Supplementary file 1 [file tc-10-2399-2016-supplement.zip]

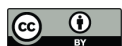

## *Supplement of*

# **Glacier change and glacial lake outburst flood risk in the Bolivian Andes**

**Simon J. Cook et al.**

*Correspondence to:* Simon J. Cook (s.j.cook@mmu.ac.uk, basalice@gmail.com)

- tc-10-2399-2016-supplement-title-page.pdf
- Bolivia Dangerous Lakes 2014.kmz

The copyright of individual parts of the supplement might differ from the CC-BY 3.0 licence.
